# Supplementary material for: Application of ComplexGAPI for the green assessment of a deep eutectic solvent-based ferrofluid assisted liquid–liquid microextraction method for detection of dimethyl phthalate in beverage samples
Source: Royal Society of Chemistry journal article supplement (doi:10.1039/d2ay01185a), 2022-01-01
Supplement: d2ay01185a1.pdf [file d2ay01185a1.pdf]

## Supplementary material

Application Complex-GAPI tool for green assessment of deep  
eutectic solvent-based ferrofluid assisted liquid-liquid  
microextraction method for detection of dimethyl phthalate in  
beverage samples

Lingjun Hou, Chenyang Zhao, Jing Zhao\*, Longshan Zhao\*

School of Pharmacy, Shenyang Pharmaceutical University, Shenyang, Liaoning  
110016, China

Corresponding author. School of Pharmacy, Shenyang Pharmaceutical University,  
103 Wenhua Road Shenhe District, 110016, Shenyang, Liaoning Province, P. R.  
China.

\*\* Corresponding author.

E-mail addresses: 29479376@qq.com (Jing. Zhao), longshanzhao@163.com  
(Longshan. Zhao).

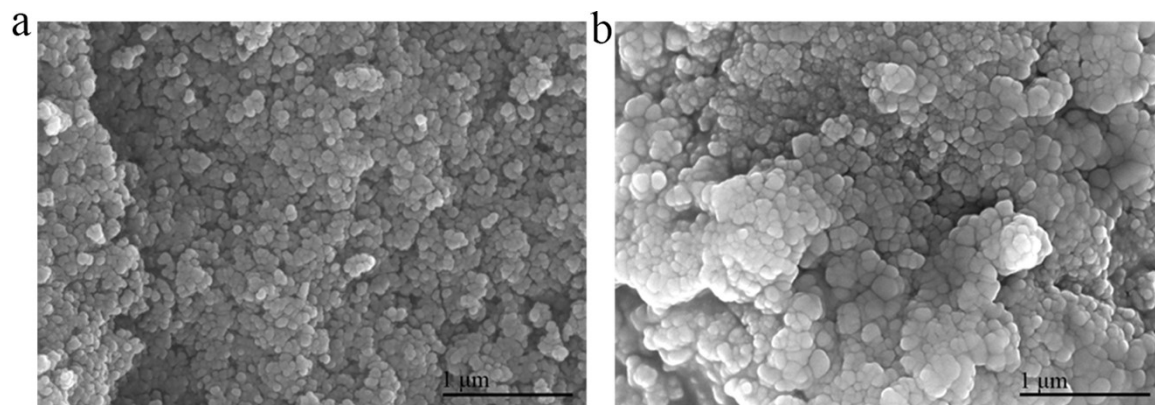

Fig. S1. SEM imaged of Fe<sub>3</sub>O<sub>4</sub>@OA (a) and ferrofluid (b).

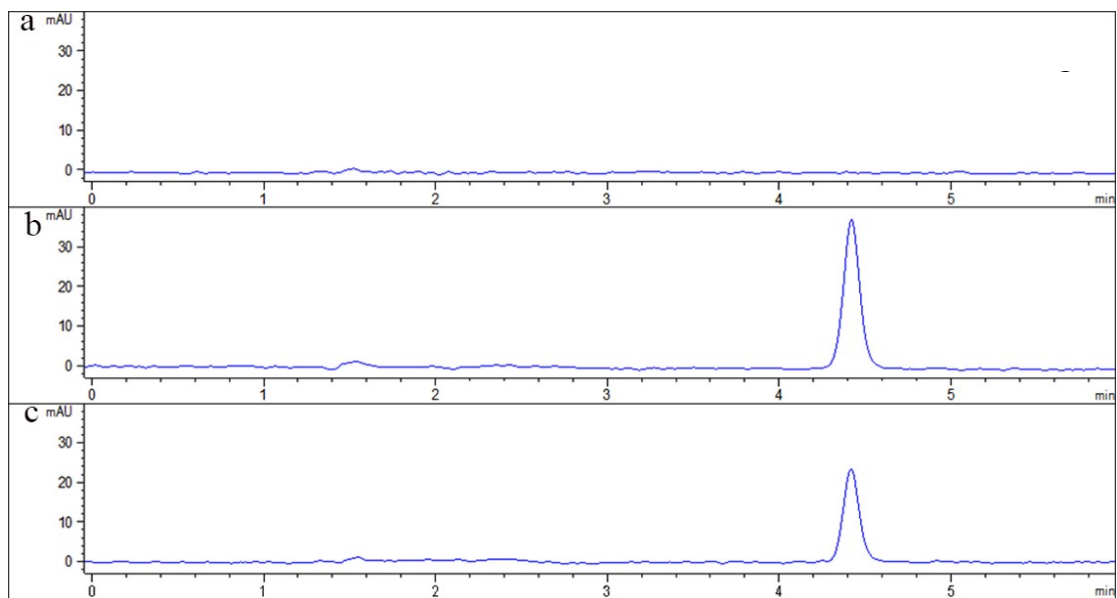

Fig. S2. The chromatograms of the blank solution (a), the standard solution (b), and spiked sample solution (c).

**Table S1** The composition and molar ratio of DESs synthesized in this work.

| Component 1 | Component 2   | Molar ratio | Abberviation |
|-------------|---------------|-------------|--------------|
| DL-Menthol  | Thymol        | 1:2         | DES-1        |
|             | Decanoic acid | 1:2         | DES-2        |
|             | Octanoic acid | 1:2         | DES-3        |
|             | Oleic acid    | 1:2         | DES-4        |
